# Supplementary material for: Modified PEDOT by benign preparing N-doped reduced graphene oxide as potential bio-electrode coating material
Source: Royal Society of Chemistry journal article supplement (doi:10.1039/c5gc02506k), 2015-11-06
Supplement: c5gc02506k1.pdf [file c5gc02506k1.pdf]

## Supporting Information

### Modified PEDOT by preparing N-doped reduced graphene oxide as potential bio-electrode coating material

*Mengmeng Fan<sup>a</sup>, Chunlin Zhu<sup>a</sup>, Lin Liu<sup>a</sup>, Qilu Wu<sup>a</sup>, Qingli Hao<sup>b</sup>, Jiazhi Yang<sup>a</sup>,*

*Dongping Sun<sup>a\*</sup>*

<sup>a</sup> Chemicobiology and Functional Materials Institute of Nanjing University of Science and Technology, Xiao Ling Wei 200, Nanjing, 210094, China. Fax: 86-25-84431939; Tel: 86-25-84315079; E-mail: [sundpe301@163.com](mailto:sundpe301@163.com)

<sup>b</sup> Key Laboratory for Soft Chemistry and Functional Materials of Ministry Education, Nanjing University of Science and Technology, Xiao Ling Wei 200, Nanjing, Jiangsu, 210094, China.

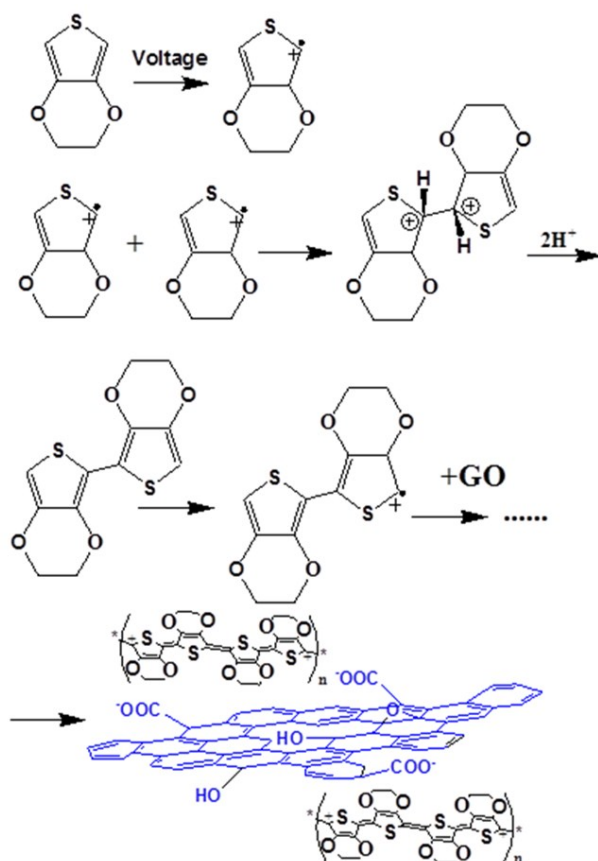

**Fig. S1** the polymerization mechanism of PEDOT/GO

The monomer ethylenedioxythiophene (EDOT) was electrochemically oxidized to form small conducting polymer chains firstly. Then positively charged PEDOT chains was combined by ionic bonds, with negative groups by GO.<sup>1</sup>

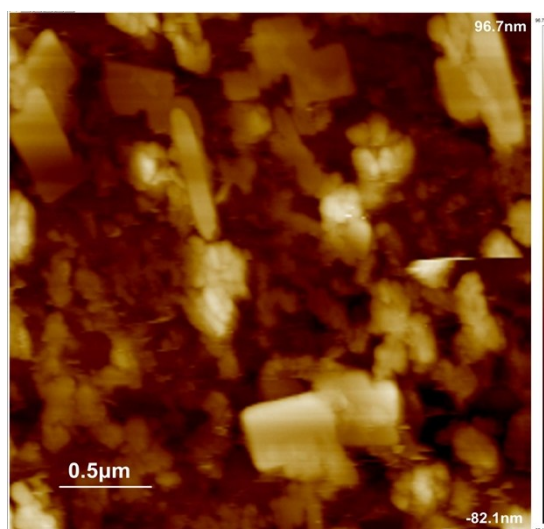

**Fig. S2** AFM image of blank PEDOT

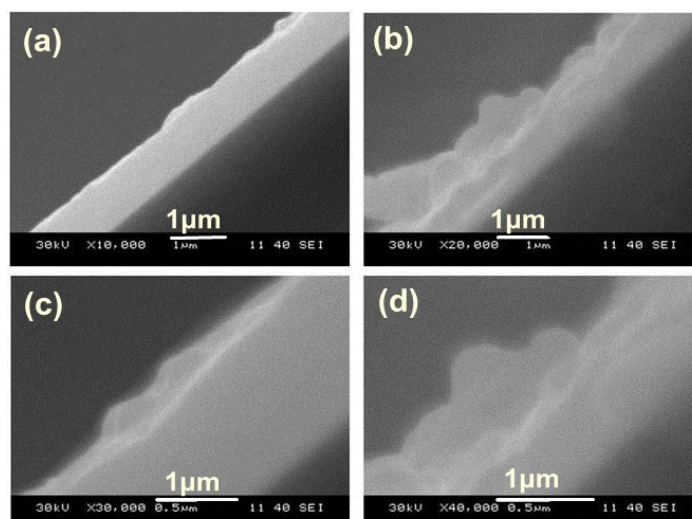

**Fig. S3** SEM images of cross section for blank PEDOT (a, c) or PEDOT/N-rGO (b, d) on a gold chip

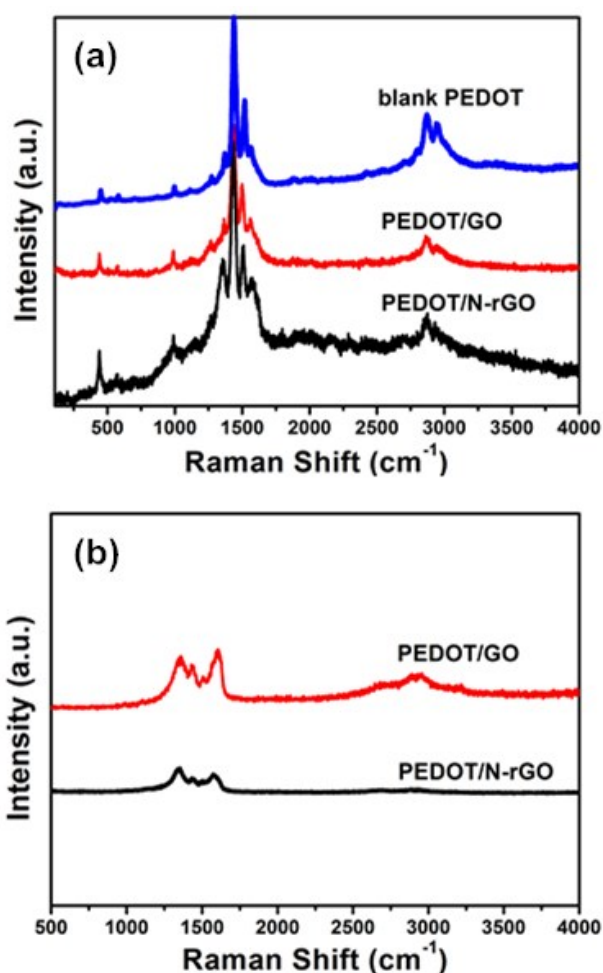

**Fig. S4** Raman spectrums of blank PEDOT, PEDOT/GO and PEDOT/ N-rGO: the area covered with polymer (a), the area covered with GO and N-rGO(b)

As shown in the **Fig. S4**, the three spectrums have the same characteristic peaks of PEDOT from 1000 to 2000  $\text{cm}^{-1}$  (**Fig. S4a**).<sup>2</sup> Namely, the peaks at 1510, 1433, 1365,

1267 and 998  $\text{cm}^{-1}$  can be assigned to asymmetrical  $\text{C}_\alpha=\text{C}_\beta$  stretching, symmetrical  $\text{C}_\alpha=\text{C}_\beta$  stretching,  $\text{C}_\alpha-\text{C}_\beta$  stretching,  $\text{C}_\alpha-\text{C}_\alpha$  (inter-ring) stretching or C-H bending, and ring deformation, respectively,<sup>3</sup> which indicated that the properties of PEDOT did not change after modification. Furthermore, compared to PEDOT/GO, the intensity of D and G peaks of PEDOT/N-rGO decreased and the  $I_D/I_G$  ratio of PEDOT/N-rGO decreased to 1.33 from 1.46 of PEDOT/GO, which indicated GO was reduced effectively (**Fig. S4b**) and restoration of  $\text{sp}^2$  carbons in graphene.<sup>4</sup>

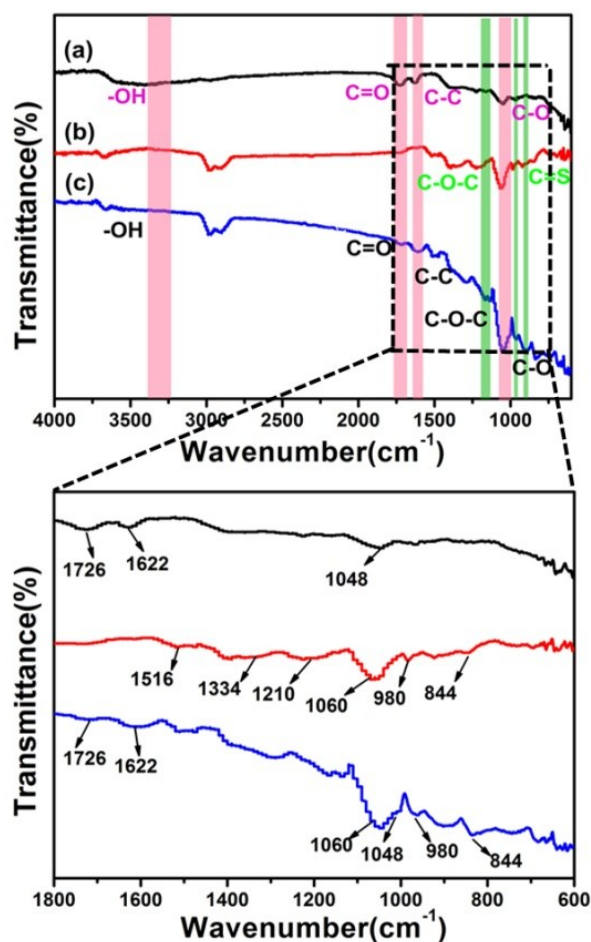

**Fig. S5** FT-IR spectrums of a=GO (pink font), b=blank PEDOT (green font) and c=PEDOT/N-rGO (black font). The characteristic peaks of GO and blank PEDOT are labeled by pink and green bands, respectively. The spectrum from 600 to 1800  $\text{cm}^{-1}$  was enlarged.

The analysis of functional groups is necessary to demonstrate the successful doping of N-rGO. As shown in **Fig. S5**, the four main peaks of GO at 1048,

1622, 1726 and 3270  $\text{cm}^{-1}$  can be assigned to C–O, C=C, C=O and –OH, respectively.<sup>5</sup> For blank PEDOT (**Fig. S5b**), the peaks at 980, 844  $\text{cm}^{-1}$  are assigned to the C=S stretching vibrations,<sup>6</sup> and the peaks at around 1210 and 1060  $\text{cm}^{-1}$  correspond to the stretching of C–O–C bond in the ethylene di-oxy group.<sup>7</sup> The C=C and C–C of thiophene at stretching vibration peaks locate at 1516 and 1334  $\text{cm}^{-1}$ , respectively.<sup>1, 8</sup> However, besides having homologous characteristic peaks of PEDOT,<sup>8</sup> there are many new peaks appeared for PEDOT/N-rGO (**Fig. S5c**) including C=C, C=O, C–O stemming from N-rGO (**Fig. S5**, enlarged region), which indicates bond formation between two components (PEDOT and N-rGO).

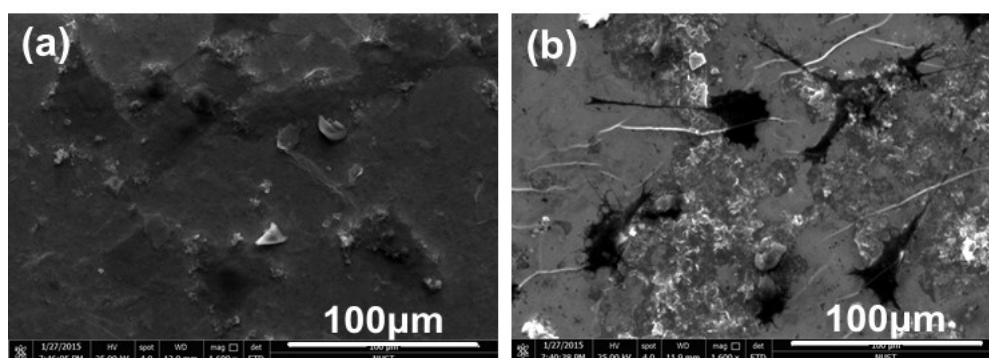

**Fig. S6** FE-SEM images of HUVECs cultured for 72 h: PEDOT/N-rGO (a),  
PEDOT/H-rGO (b)

- 1 H.-C. Tian, J.-Q. Liu, D.-X. Wei, X.-Y. Kang, C. Zhang, J.-C. Du, B. Yang, X. Chen, H.-Y. Zhu, Y.-N. NuLi and C.-S. Yang, *Biomaterials*, 2014, 35 (7), 2120-2129.
- 2 J.-W. Back, S. Lee, C.-R. Hwang, C.-S. Chi and J.-Y. Kim, *Macromol. Res.*, 2011, 19 (1), 33-37.

- 3 S. Garreau, G. Louarn, J. P. Buisson, G. Froyer and S. Lefrant, *Macromolecules*, 1999, 32 (20), 6807-6812.
- 4 M. Fan, C. Zhu, Z.-Q. Feng, J. Yang, L. Liu and D. Sun, *Nanoscale*, 2014, 6 (9), 4882.
- 5 K. Krishnamoorthy, M. Veerapandian, K. Yun and S. J. Kim, *Carbon*, 2013, 53 (0), 38-49.
- 6 M. Selvakumar and D. Krishna Bhat, *J. Appl. Polym. Sci.*, 2008, 107 (4), 2165-2170.
- 7 S. Patra and N. Munichandraiah, *J. Appl. Polym. Sci.*, 2007, 106 (2), 1160-1171.
- 8 Y. Xu, Y. Wang, J. Liang, Y. Huang, Y. Ma, X. Wan and Y. Chen, *Nano Res.*, 2009, 2 (4), 343-348.
